# Supplementary material for: Chemical contaminant levels in edible seaweeds of the Salish Sea and implications for their consumption
Source: PubMed Central journal article supplement (PMC9506624; doi:10.1371/journal.pone.0269269), 2022-09-23
Supplement: pone.0269269.s006.pdf [file pone.0269269.s006.pdf]

**Table S1.**

| <b>Contaminant</b>  | <b>Species</b>        | <b>Location</b>                  | <b>Tissue Type</b>              | <b>Mean <math>\pm</math> SD (Range)</b>                          |
|---------------------|-----------------------|----------------------------------|---------------------------------|------------------------------------------------------------------|
| PCBs (total)        | <i>F. virsoides</i>   | Venice Lagoon, Italy             | NS                              | 3.0 $\pm$ 1.7 (1.7-4.2) <sup>w</sup>                             |
| BaP                 | <i>F. serratus</i>    | Norway                           | thallus except stipe & holdfast | (2-20) <sup>q</sup>                                              |
|                     | <i>F. vesiculosus</i> | Gulf of Finland                  | NS                              | 0.7 <sup>p</sup>                                                 |
|                     | <i>F. vesiculosus</i> | Norway                           | thallus except stipe & holdfast | (trace - 64) <sup>q</sup>                                        |
| Arsenic (inorganic) | <i>F. spiralis</i>    | New Hampshire, USA               | NS                              | 0.04 $\pm$ 0.05 <sup>hh</sup>                                    |
|                     | <i>F. vesiculosus</i> | Spain                            | commercial samples              | 0.34 $\pm$ 0.04 <sup>a</sup>                                     |
|                     |                       | New Hampshire, USA<br>Maine, USA | NS<br>NS                        | 0.06 $\pm$ 0.04 <sup>hh</sup><br>< detection limit <sup>hh</sup> |
| Arsenic (total)     | <i>Fucus sp.</i>      | Greenland                        | NS                              | 26.6 $\pm$ 6.6 <sup>r</sup>                                      |
|                     | <i>F. ceranoides</i>  | SW England                       | whole thallus                   | 18.8-77.1 <sup>jj</sup>                                          |
|                     | <i>F. distichus</i>   | Greenland                        | NS                              | 40.1 $\pm$ 5.9 <sup>r</sup>                                      |
|                     | <i>F. distichus</i> * | Vancouver BC, Canada             | receptacles (Jul)               | 8.9 $\pm$ 0.5 <sup>s</sup>                                       |
|                     |                       | Vancouver BC, Canada             | non-reproductive thallus (Jul)  | 9.0 $\pm$ 0.5 <sup>s</sup>                                       |
|                     |                       | Vancouver BC, Canada             | non-reproductive apices (Feb)   | 17.1 $\pm$ 0.8 <sup>s</sup>                                      |
|                     |                       | Vancouver BC, Canada             | non-meristematic thallus (Feb)  | 16.2 $\pm$ 0.9 <sup>s</sup>                                      |
|                     | <i>F. evanescens</i>  | Denmark                          | NS                              | 14.08 <sup>cc</sup>                                              |
|                     | <i>F. serratus</i>    | Denmark                          | NS                              | 30.3-9.58 (105-961) <sup>cc</sup>                                |
|                     | <i>F. spiralis</i>    | Denmark                          | NS                              | 8.94 <sup>cc</sup>                                               |
|                     | <i>F. vesiculosus</i> | New Hampshire, USA               | NS                              | 16.3 $\pm$ 1.4 <sup>hh</sup>                                     |
|                     |                       | Spain                            | commercial samples              | 50 $\pm$ 0.03 <sup>a</sup>                                       |
|                     |                       | West Greenland                   | NS                              | **35.2-35.8 <sup>c</sup>                                         |
|                     |                       | Italy                            | commercial samples              | 34.3 $\pm$ 6.9 <sup>h</sup>                                      |
|                     |                       | France                           | commercial samples              | 47 $\pm$ 2 <sup>l</sup>                                          |
|                     |                       | NW Spain                         | apices                          | (28.1-55.6) <sup>m</sup>                                         |
|                     |                       | Galicia, NW Spain                | dichotomies                     | (15.9-207) <sup>n</sup>                                          |
|                     |                       | Greenland                        | NS                              | 33.3 $\pm$ 7.6 <sup>r</sup>                                      |
|                     |                       | West Greenland                   | apices                          | 25.1-30.7 <sup>bb</sup>                                          |
|                     |                       | Denmark                          | NS                              | 28.4-19.7 (10.4-117) <sup>cc</sup>                               |
|                     |                       | North Sea                        | NS                              | 46.5 <sup>gg</sup>                                               |
|                     |                       | Baltic Sea                       | NS                              | 21.7 <sup>gg</sup>                                               |
|                     |                       | New Hampshire, USA<br>Maine, USA | NS<br>NS                        | 28.9 $\pm$ 2.16 <sup>hh</sup><br>32.8 $\pm$ 3.73 <sup>hh</sup>   |
| Norway              | commercial samples    |                                  | 20 <sup>ii</sup>                |                                                                  |
| <i>F. virsoides</i> | Venice Lagoon, Italy  | whole thallus                    | 40 $\pm$ 45 (8-73) <sup>f</sup> |                                                                  |
| Cadmium             | <i>Fucus spp.</i>     | Barents Sea                      | whole thallus                   | 1.9 $\pm$ 0.5 (1.3-2.7) <sup>g</sup>                             |

|                       |                                |                        |                                     |
|-----------------------|--------------------------------|------------------------|-------------------------------------|
|                       | Sea of Okhotsk                 | whole thallus          | 3.3 ± 1.9 (1-9) <sup>g</sup>        |
|                       | Sea of Japan                   | whole thallus          | 2.5 ± 1.9 (1-7.8) <sup>ge</sup>     |
|                       | White Sea                      | whole thallus          | 0.48 (0.1-1.2) <sup>g</sup>         |
|                       | Greenland                      | NS                     | 36.7 ± 4.1 <sup>r</sup>             |
|                       | UK & Ireland                   | whole thallus          | **1.1-2.5 (0.05-21) <sup>y</sup>    |
|                       | SW Spain & Portugal            | NS                     | 1.7-3.2 <sup>ff</sup>               |
| <i>F. ceranoides</i>  | SW England                     | whole thallus          | 0.20-1.01 <sup>jj</sup>             |
|                       | NW Spain                       | apices                 | 0.19-1.74 <sup>kk</sup>             |
| <i>F. distichus</i>   | Greenland                      | NS                     | 0.95 ± 0.37 <sup>r</sup>            |
|                       | Murmansk Coast, Russia         | whole thallus          | 0.25-0.88 <sup>v</sup>              |
| <i>F. evanescens</i>  | Denmark                        | NS                     | 0.52 <sup>cc</sup>                  |
| <i>F. serratus</i>    | Severn Estuary, UK             | mature thallus         | 10.6-35.9 <sup>u</sup>              |
|                       | Murmansk Coast, Russia         | whole thallus          | 0.31-1.27 <sup>v</sup>              |
|                       | Denmark                        | NS                     | 1.04-0.34 (0.63-1.56) <sup>cc</sup> |
| <i>F. spiralis</i>    | Canary Islands                 | whole thallus          | 0.62 ± 0.18 <sup>t</sup>            |
|                       | NW Portugal                    | soft tissues           | 0.07-3.58 (0.4-20.8) <sup>z</sup>   |
|                       | Denmark                        | NS                     | 0.46 <sup>cc</sup>                  |
|                       | Azores                         | NS                     | 0.86-1.46 <sup>mm</sup>             |
| <i>F. vesiculosus</i> | Spain                          | commercial samples     | 0.55 ± 0.01 <sup>a</sup>            |
|                       | Humber Estuary, England        | fronds                 | 5.0-5.2 (1.6-10.5) <sup>b</sup>     |
|                       | Italy                          | commercial samples     | 1.1 ± 0.2 <sup>h</sup>              |
|                       | NE England                     | NS                     | **1.1 (0.5-2.7) <sup>i</sup>        |
|                       | Stockholm Archipelago          | older tissues          | 4.2-14.7 <sup>j</sup>               |
|                       | Stockholm Archipelago          | apices                 | 6.8-13.3 <sup>j</sup>               |
|                       | Bristol Channel, England       | fronds                 | 3.82-25.6 <sup>k</sup>              |
|                       | NW Spain                       | apices                 | 0.47-0.82 <sup>m</sup>              |
|                       | Galicia, NW Spain              | dichotomies            | 142-5107 <sup>n</sup>               |
|                       | NE England                     | top 8-10 cm of thallus | 0.02-10.03 <sup>m</sup>             |
|                       | Greenland                      | NS                     | 1.42 ± 1.01 <sup>r</sup>            |
|                       | Öresund Sound, Sweden/Denmark  | apices                 | 1.9-3.9 <sup>x</sup>                |
|                       | Murmansk Coast, Russia         | whole thallus          | 0.30-0.72 <sup>v</sup>              |
|                       | West Greenland                 | apices                 | **3.30 (2.25-4.81) <sup>aa</sup>    |
|                       | Denmark                        | NS                     | 0.78-0.37 (0.30-1.97) <sup>cc</sup> |
|                       | Bothnian & Baltic Seas, Sweden | older tissues          | 4.1-17.2 <sup>ee</sup>              |
|                       | Bothnian & Baltic Seas, Sweden | apices                 | 4.4-12.9 <sup>ee</sup>              |
|                       | North Sea                      | NS                     | 0.56 <sup>gg</sup>                  |
|                       | Bothnian & Baltic Seas, Sweden | apices                 | 4.4-12.9 <sup>ee</sup>              |
|                       | Bothnian & Baltic Seas, Sweden | old thallus            | 4.1-17.2 <sup>m</sup>               |
|                       | Norway                         | commercial samples     | 0.34 <sup>ii</sup>                  |
|                       | NW Spain                       | apices                 | 0.59-1.20 <sup>ff</sup>             |

|      |                       |                                |                         |                                     |
|------|-----------------------|--------------------------------|-------------------------|-------------------------------------|
|      | <i>F. virsoides</i>   | Venice Lagoon, Italy           | whole thallus           | 0.6 ± 0.3 (0.4-0.8) <sup>f</sup>    |
| Lead | <i>Fucus</i> spp.     | Greenland                      | NS                      | 1.59 ± 2.18 <sup>r</sup>            |
|      |                       | SW Spain & Portugal            | NS                      | 5-13 <sup>ff</sup>                  |
|      | <i>F. ceranoides</i>  | SW England                     | whole thallus           | 2.93-14.3 <sup>jj</sup>             |
|      |                       | NW Spain                       | apices                  | 0.38-7.45 <sup>kk</sup>             |
|      | <i>F. distichus</i>   | Galicia, Spain                 | whole thallus           | 4.40 <sup>ll</sup>                  |
|      |                       | Greenland                      | NS                      | 0.24 ± 0.07 <sup>r</sup>            |
|      | <i>F. evanescens</i>  | Murmansk Coast, Russia         | whole thallus           | 0.31-0.97 <sup>v</sup>              |
|      | <i>F. gardneri</i>    | Denmark                        | NS                      | 0.51 <sup>cc</sup>                  |
|      | <i>F. serratus</i>    | Raritan Bay, NJ, USA           | NS                      | 0.22-230 <sup>d</sup>               |
|      | <i>F. spiralis</i>    | Severn Estuary, UK             | mature thallus          | 6.4-7.9 <sup>u</sup>                |
|      |                       | Murmansk Coast, Russia         | whole thallus           | 0.13-1.05 <sup>v</sup>              |
|      | <i>F. vesiculosus</i> | Denmark                        | NS                      | 0.47-0.18 (0.24-0.87) <sup>cc</sup> |
|      |                       | Canary Islands                 | whole thallus           | 4.96 ± 2.44 <sup>t</sup>            |
|      | <i>F. vesiculosus</i> | Denmark                        | NS                      | 0.96 <sup>cc</sup>                  |
|      |                       | Galicia, Spain                 | whole thallus           | 5.71 <sup>ll</sup>                  |
|      | <i>F. vesiculosus</i> | Azores                         | NS                      | 0.16-0.38 <sup>mm</sup>             |
|      |                       | Spain                          | commercial samples      | 0.51 ± 0.04 <sup>a</sup>            |
|      | <i>F. vesiculosus</i> | Humber Estuary, England        | fronds                  | 5-8.1 (2.7-21.5) <sup>b</sup>       |
|      |                       | Italy                          | commercial samples      | 4 ± 0.3 <sup>h</sup>                |
|      | <i>F. vesiculosus</i> | NE England                     | NS                      | **4.5 (3.1-10) <sup>i</sup>         |
|      |                       | Stockholm Archipelago          | older tissues           | 0.9-6.9 <sup>j</sup>                |
|      | <i>F. vesiculosus</i> | Stockholm Archipelago          | apices                  | 1.7-6.6 <sup>j</sup>                |
|      |                       | NW Spain                       | apices                  | 0.25-1.62 <sup>m</sup>              |
|      | <i>F. vesiculosus</i> | Galicia, NW Spain              | dichotomies             | 0.18-1.68 <sup>n</sup>              |
|      |                       | NE England                     | upper 8-10 cm of fronds | 0.1-12.1 <sup>o</sup>               |
|      | <i>F. vesiculosus</i> | Greenland                      | NS                      | 0.10 ± 0.06 <sup>r</sup>            |
|      |                       | Öresund Sound, Sweden/Denmark  | apices                  | 14.0-27.4 <sup>x</sup>              |
|      | <i>F. vesiculosus</i> | Ireland & UK                   | whole thallus           | 2.1-4.0 (0.5-9.0) <sup>y</sup>      |
|      |                       | West Greenland                 | apices                  | **0.25 (0.047-0.70) <sup>aa</sup>   |
|      | <i>F. vesiculosus</i> | Murmansk Coast, Russia         | whole thallus           | 0.12-0.77 <sup>v</sup>              |
|      |                       | Raritan Bay, New York, USA     | NS                      | (1.3-2.4) <sup>dd</sup>             |
|      | <i>F. vesiculosus</i> | Bothnian & Baltic Seas, Sweden | older tissues           | 2.1-7.2 <sup>ee</sup>               |
|      |                       | Bothnian & Baltic Seas, Sweden | apices                  | 2.0-11.7 <sup>ee</sup>              |
|      | <i>F. vesiculosus</i> | North Sea                      | NS                      | 1.86 <sup>gg</sup>                  |
|      |                       | Baltic Sea                     | NS                      | 1.04 <sup>gg</sup>                  |
|      | <i>F. vesiculosus</i> | Denmark                        | NS                      | 0.90-1.73 (0.19-9.60) <sup>cc</sup> |
|      |                       | Norway                         | commercial samples      | 0.38 <sup>ii</sup>                  |
|      | <i>F. vesiculosus</i> | NW Spain                       | apices                  | 0.35-3.56 <sup>kk</sup>             |
|      |                       | Venice Lagoon, Italy           | whole thallus           | 1.6 ± 0.6 (1.2-2.0) <sup>f</sup>    |

|         |                       |                      |                             |                                         |
|---------|-----------------------|----------------------|-----------------------------|-----------------------------------------|
| Mercury | <i>Fucus</i> spp.     | NW Portugal          | receptacles                 | (0.012-0.061) <sup>e</sup>              |
|         |                       | Greenland            | NS                          | <0.023 <sup>r</sup>                     |
|         | <i>F. distichus</i>   | Greenland            | NS                          | <0.023 <sup>r</sup>                     |
|         | <i>F. evanescens</i>  | Denmark              | NS                          | 0.008 <sup>cc</sup>                     |
|         | <i>F. gardneri</i>    | Raritan Bay, NJ, USA | NA                          | 0.0068 <sup>d</sup>                     |
|         | <i>F. ceranoides</i>  | NW Spain             | apices                      | 0.020-0.027 <sup>kk</sup>               |
|         | <i>F. serratus</i>    | Denmark              | NS                          | 0.009-0.003 (0.005-0.015) <sup>cc</sup> |
|         | <i>F. spiralis</i>    | Denmark              | NS                          | 0.019 <sup>cc</sup>                     |
|         | <i>F. vesiculosus</i> | NW Spain             | commercial samples          | 0.036 ± 0.006 <sup>a</sup>              |
|         |                       | NW Spain             | apices                      | 0.015-0.056 <sup>m</sup>                |
|         |                       | Galicia, NW Spain    | dichotomies                 | 0.004-0.060 <sup>n</sup>                |
|         |                       | Greenland            | NS                          | <0.023 <sup>r</sup>                     |
|         |                       | North Sea            | NS                          | 0.010 <sup>gg</sup>                     |
|         |                       | Baltic Sea           | NS                          | 0.0018 <sup>gg</sup>                    |
|         |                       | Denmark              | NS                          | 0.012-0.007 (0.003-0.042) <sup>cc</sup> |
|         |                       | Norway               | commercial samples          | 1.08 <sup>ii</sup>                      |
|         | NW Spain              | apices               | 0.020 – 0.031 <sup>kk</sup> |                                         |

\*Reported as *F. gardneri*

\*\* Reported as a geometric mean

<sup>a</sup>[1]; <sup>b</sup>[2]; <sup>c</sup>[3]; <sup>d</sup>[4]; <sup>e</sup>[5]; <sup>f</sup>[6]; <sup>g</sup>[7]; <sup>h</sup>[8]; <sup>i</sup>[9]; <sup>j</sup>[10]; <sup>k</sup>[11]; <sup>l</sup>[12]; <sup>m</sup>[13]; <sup>n</sup>[14]; <sup>o</sup>[15]; <sup>p</sup>[16]; <sup>q</sup>[17]; <sup>r</sup>[18]; <sup>s</sup>[19]; <sup>t</sup>[20]; <sup>u</sup>[21]; <sup>v</sup>[22]; <sup>w</sup>[23]; <sup>x</sup>[24]; <sup>y</sup>[25]; <sup>z</sup>[26]; <sup>aa</sup>[27]; <sup>bb</sup>[28]; <sup>cc</sup>[29]; <sup>dd</sup>[30]; <sup>ee</sup>[31]; <sup>ff</sup>[32]; <sup>gg</sup>[33]; <sup>hh</sup>[34]; <sup>ii</sup>[35]; <sup>jj</sup>[36]; <sup>kk</sup>[37]; <sup>ll</sup>[38]; <sup>mm</sup>[39]
