# Supplementary material for: Chemical contaminant levels in edible seaweeds of the Salish Sea and implications for their consumption
Source: PubMed Central journal article supplement (PMC9506624; doi:10.1371/journal.pone.0269269), 2022-09-23
Supplement: pone.0269269.s007.pdf [file pone.0269269.s007.pdf]

**Table S2.**

| Contaminant         | Location              | Tissue Type        | Mean $\pm$ SD (Range)             |
|---------------------|-----------------------|--------------------|-----------------------------------|
| Arsenic (inorganic) | Vancouver, BC, Canada | fronds             | 2.7 <sup>d</sup>                  |
|                     | Vancouver, BC, Canada | stipes             | 0.5 <sup>d</sup>                  |
| Arsenic (total)     | Vancouver, BC, Canada | fronds             | 92.4 <sup>d</sup>                 |
|                     | Vancouver, BC, Canada | stipes             | 48.8 <sup>d</sup>                 |
|                     | Bamfield, BC, Canada  | commercial samples | (66 -79) <sup>a</sup>             |
|                     | Washington, USA       | fronds             | 62 $\pm$ 1.4 <sup>b</sup>         |
|                     | Washington, USA       | stipes             | 72 $\pm$ 1.3 <sup>b</sup>         |
| Cadmium             | Washington, USA       | bulbs              | 41 $\pm$ 1.0 <sup>b</sup>         |
|                     | Vancouver, BC, Canada | fronds             | 2 <sup>c</sup>                    |
|                     | Bamfield, BC, Canada  | commercial samples | 0.30 - 2.76 <sup>a</sup>          |
| Lead                | Bamfield, BC, Canada  | commercial samples | <0.01-0.08 <sup>a</sup>           |
|                     | Vancouver, BC, Canada | fronds             | 0.9 <sup>c</sup>                  |
| Mercury             | Bamfield, BC, Canada  | commercial samples | Not detected (<0.05) <sup>a</sup> |
|                     | Vancouver, BC, Canada | fronds             | Not detected (<0.05) <sup>c</sup> |

<sup>a</sup> [35]; <sup>b</sup> [40]; <sup>c</sup> [41]; <sup>d</sup> [42]
