# Supplementary material for: Chemical contaminant levels in edible seaweeds of the Salish Sea and implications for their consumption
Source: PubMed Central journal article supplement (PMC9506624; doi:10.1371/journal.pone.0269269), 2022-09-23
Supplement: pone.0269269.s008.pdf [file pone.0269269.s008.pdf]

Table S3.

| Analyte | Fig 3 Label               | Description                                                                                   | Concentration       | Portion Size (g) |
|---------|---------------------------|-----------------------------------------------------------------------------------------------|---------------------|------------------|
| PCBs    | Mayonnaise                | Mayonnaise                                                                                    | 0.001 <sup>a</sup>  | 15 <sup>e</sup>  |
| PCBs    | Chocolate                 | Chocolate bars                                                                                | 0.24 <sup>a</sup>   | 30 <sup>e</sup>  |
| PCBs    | French fries              | French fries                                                                                  | 0.1118 <sup>a</sup> | 70 <sup>e</sup>  |
| PCBs    | Hot dog                   | Hot dog                                                                                       | 0.277 <sup>a</sup>  | 55 <sup>e</sup>  |
| PCBs    | Cheddar cheese            | Cheddar cheese                                                                                | 0.41 <sup>a</sup>   | 30 <sup>e</sup>  |
| PCBs    | Butter                    | Butter                                                                                        | 0.84 <sup>a</sup>   | 15 <sup>e</sup>  |
| PCBs    | Eggs                      | Eggs                                                                                          | 0.36 <sup>a</sup>   | 50 <sup>e</sup>  |
| PCBs    | Shellfish                 | Shellfish                                                                                     | 0.25 <sup>a</sup>   | 85 <sup>e</sup>  |
| PCBs    | Pizza                     | Pizza                                                                                         | 0.16 <sup>a</sup>   | 140 <sup>e</sup> |
| PCBs    | <i>F. distichus</i>       | <i>F. distichus</i> : mean of all sites except Smith Cove, Vashon Island (June), and Rock Bay | 10.02 <sup>f</sup>  | 5 <sup>e</sup>   |
| PCBs    | <i>F. distichus</i> - SC  | <i>F. distichus</i> collected from Smith Cove                                                 | 18.9 <sup>f</sup>   | 5 <sup>e</sup>   |
| PCBs    | <i>F. distichus</i> - VI6 | <i>F. distichus</i> collected from Vashon Island (June)                                       | 19.6 <sup>f</sup>   | 5 <sup>e</sup>   |
| PCBs    | <i>F. distichus</i> - RB  | <i>F. distichus</i> collected from Rock Bay                                                   | 21.2 <sup>f</sup>   | 5 <sup>e</sup>   |
| PCBs    | Marine fish               | Marine fish                                                                                   | 4.2 <sup>a</sup>    | 85 <sup>e</sup>  |
| PCBs    | Freshwater fish           | Freshwater fish                                                                               | 7.2 <sup>a</sup>    | 85 <sup>e</sup>  |
| BaP     | Bacon                     | Bacon, pan-fried, well done                                                                   | 0.2 <sup>c</sup>    | 16 <sup>c</sup>  |
| BaP     | Hotdog                    | Hot dogs, grilled, very well done                                                             | 0.05 <sup>c</sup>   | 55 <sup>e</sup>  |
| BaP     | <i>F. distichus</i>       | <i>F. distichus</i> : mean of all sites except Rock Bay                                       | 1.14 <sup>g</sup>   | 5 <sup>e</sup>   |
| BaP     | Fried fish                | Fish sandwich, deep fried, fast food                                                          | 0.07 <sup>c</sup>   | 112 <sup>c</sup> |
| BaP     | Spinach                   | Spinach, fresh and frozen                                                                     | 0.10 <sup>c</sup>   | 85 <sup>e</sup>  |
| BaP     | Smoked fish               | Smoked fish                                                                                   | 0.10 <sup>c</sup>   | 55 <sup>e</sup>  |
| BaP     | Pretzels                  | Pretzels                                                                                      | 0.37 <sup>c</sup>   | 30 <sup>c</sup>  |
| BaP     | Broccoli                  | Broccoli                                                                                      | 0.17 <sup>c</sup>   | 85 <sup>e</sup>  |
| BaP     | Potato                    | White potato                                                                                  | 0.17 <sup>c</sup>   | 110 <sup>e</sup> |
| BaP     | Popcorn                   | Popped popcorn                                                                                | 0.56 <sup>c</sup>   | 30 <sup>c</sup>  |
| BaP     | Yogurt                    | Yogurt, flavored/frozen                                                                       | 0.18 <sup>c</sup>   | 227 <sup>c</sup> |
| BaP     | Kale                      | Kale                                                                                          | 0.47 <sup>c</sup>   | 85 <sup>e</sup>  |
| BaP     | Pumpkin pie               | Pumpkin pie                                                                                   | 0.47 <sup>c</sup>   | 135 <sup>c</sup> |
| BaP     | Hamburger                 | Hamburger, grilled/BBQ, very well done                                                        | 1.520 <sup>c</sup>  | 85 <sup>c</sup>  |
| BaP     | <i>F. distichus</i> -RB   | <i>F. distichus</i> collected from Rock Bay                                                   | 64.63 <sup>f</sup>  | 5 <sup>f</sup>   |
| BaP     | Chicken                   | Chicken with bone/skin, grilled/BBQ, well done                                                | 4.570 <sup>c</sup>  | 96 <sup>c</sup>  |
| BaP     | Steak                     | Steak, grilled/BBQ, very well done                                                            | 4.860 <sup>c</sup>  | 112 <sup>c</sup> |
| tAs     | Peanut butter             | Peanut butter                                                                                 | 0.021 <sup>b</sup>  | 32 <sup>e</sup>  |
| tAs     | Bread                     | Bread, whole wheat                                                                            | 0.018 <sup>b</sup>  | 50 <sup>e</sup>  |
| tAs     | Raspberries               | Raspberries                                                                                   | 0.013 <sup>b</sup>  | 140 <sup>e</sup> |
| tAs     | Mushrooms                 | Mushrooms                                                                                     | 0.028 <sup>b</sup>  | 85 <sup>e</sup>  |
| tAs     | Cereal                    | Cereal, wheat, rice, bran                                                                     | 0.076 <sup>b</sup>  | 40 <sup>e</sup>  |
| tAs     | Hamburger                 | Hamburger                                                                                     | 0.047 <sup>b</sup>  | 85 <sup>e</sup>  |
| tAs     | Rice                      | Rice                                                                                          | 0.064 <sup>b</sup>  | 140 <sup>e</sup> |
| tAs     | Freshwater fish           | Fish, fresh water                                                                             | 0.357 <sup>b</sup>  | 85 <sup>e</sup>  |
| tAs     | Shellfish                 | Shellfish                                                                                     | 0.362 <sup>b</sup>  | 85 <sup>e</sup>  |
| tAs     | Canned fish               | Fish, canned                                                                                  | 0.752 <sup>b</sup>  | 85 <sup>e</sup>  |
| tAs     | <i>F. distichus</i>       | <i>F. distichus</i> : mean of all sites except Vashon Island (August)                         | 26.50 <sup>f</sup>  | 5 <sup>e</sup>   |
| tAs     | <i>F. distichus</i> -VI8  | <i>F. distichus</i> collected from Vashon Island (August)                                     | 37.01 <sup>f</sup>  | 5 <sup>e</sup>   |
| tAs     | <i>N. luetkeana</i>       | <i>N. luetkeana</i> : mean of all sites except Brochie Rocks                                  | 70.89 <sup>f</sup>  | 5 <sup>e</sup>   |
| tAs     | Marine fish               | Fish, marine                                                                                  | 5.529 <sup>b</sup>  | 85 <sup>e</sup>  |
| tAs     | <i>N. luetkeana</i> - BR  | <i>N. luetkeana</i> collected from Brochie Rocks                                              | 98.92 <sup>f</sup>  | 5 <sup>e</sup>   |
| Cd      | Marine fish               | Fish, marine                                                                                  | 0.004 <sup>b</sup>  | 85 <sup>e</sup>  |
| Cd      | Chocolate                 | Chocolate bars                                                                                | 0.011 <sup>b</sup>  | 30 <sup>e</sup>  |
| Cd      | Whole wheat bread         | Bread, whole wheat                                                                            | 0.020 <sup>b</sup>  | 50 <sup>e</sup>  |
| Cd      | Cereal                    | Cereal, wheat, rice, bran                                                                     | 0.038 <sup>b</sup>  | 40 <sup>e</sup>  |

|    |                          |                                                                                  |                     |                  |
|----|--------------------------|----------------------------------------------------------------------------------|---------------------|------------------|
| Cd | Strawberries             | Strawberries                                                                     | 0.011 <sup>b</sup>  | 140 <sup>e</sup> |
| Cd | Celery                   | Celery                                                                           | 0.027 <sup>b</sup>  | 85 <sup>e</sup>  |
| Cd | Nuts                     | Nuts                                                                             | 0.084 <sup>b</sup>  | 30 <sup>e</sup>  |
| Cd | Carrots                  | Carrots                                                                          | 0.030 <sup>b</sup>  | 85 <sup>e</sup>  |
| Cd | Potato chips             | Potato chips                                                                     | 0.118 <sup>b</sup>  | 30 <sup>e</sup>  |
| Cd | Pasta                    | Pasta, plain                                                                     | 0.026 <sup>b</sup>  | 140 <sup>e</sup> |
| Cd | Potatos                  | Potatos, baked with skins                                                        | 0.057 <sup>b</sup>  | 70 <sup>e</sup>  |
| Cd | Lettuce                  | Lettuce                                                                          | 0.082 <sup>b</sup>  | 85 <sup>e</sup>  |
| Cd | Spinach                  | Spinach                                                                          | 0.114 <sup>b</sup>  | 85 <sup>e</sup>  |
| Cd | Sunflower seeds          | Sunflower Seeds (shelled), roasted, salted                                       | 0.389 <sup>d</sup>  | 30 <sup>e</sup>  |
| Cd | <i>F. distichus</i>      | <i>F. distichus</i> : mean of all sites except Jefferson Beach                   | 2.480 <sup>f</sup>  | 5 <sup>e</sup>   |
| Cd | <i>F. distichus</i> - JB | <i>F. distichus</i> collected from Jefferson Beach                               | 4.250 <sup>f</sup>  | 5 <sup>e</sup>   |
| Cd | <i>N. luetkeana</i>      | <i>N. luetkeana</i> : mean of all sites                                          | 5.691 <sup>f</sup>  | 5 <sup>e</sup>   |
| Pb | Hot dogs                 | Hot dogs                                                                         | 0.004 <sup>b</sup>  | 55 <sup>e</sup>  |
| Pb | Marine fish              | Marine fish                                                                      | 0.003 <sup>b</sup>  | 85 <sup>e</sup>  |
| Pb | French fries             | French fries                                                                     | 0.004 <sup>b</sup>  | 70 <sup>e</sup>  |
| Pb | Chocolate                | Chocolate bars                                                                   | 0.009 <sup>b</sup>  | 30 <sup>e</sup>  |
| Pb | <i>N. luetkeana</i>      | <i>N. luetkeana</i> : mean of all sites except Four-Mile Rock and Victoria Jetty | 0.060 <sup>f</sup>  | 5 <sup>e</sup>   |
| Pb | Pizza                    | Pizza                                                                            | 0.002 <sup>b</sup>  | 140 <sup>e</sup> |
| Pb | <i>F. distichus</i>      | <i>F. distichus</i> : mean of all sites except Rock Bay and Point Hope           | 0.091 <sup>f</sup>  | 5 <sup>e</sup>   |
| Pb | Beets                    | Beets                                                                            | 0.007 <sup>b</sup>  | 85 <sup>e</sup>  |
| Pb | Broccoli                 | Broccoli                                                                         | 0.007 <sup>b</sup>  | 85 <sup>e</sup>  |
| Pb | <i>N. luetkeana</i> - FM | <i>N. luetkeana</i> collected from Four-Mile Rock                                | 0.132 <sup>f</sup>  | 5 <sup>e</sup>   |
| Pb | <i>N. luetkeana</i> - VJ | <i>N. luetkeana</i> collected from Victoria Jetty                                | 0.136 <sup>f</sup>  | 5 <sup>e</sup>   |
| Pb | Spinach                  | Spinach                                                                          | 0.009 <sup>b</sup>  | 85 <sup>e</sup>  |
| Pb | Rice                     | Rice                                                                             | 0.007 <sup>b</sup>  | 140 <sup>e</sup> |
| Pb | Shellfish                | Shellfish                                                                        | 0.016 <sup>b</sup>  | 85 <sup>e</sup>  |
| Pb | Apricots                 | Apricots                                                                         | 0.027 <sup>b</sup>  | 140 <sup>e</sup> |
| Pb | <i>F. distichus</i> - RB | <i>F. distichus</i> collected from Rock Bay                                      | 9.706 <sup>b</sup>  | 5 <sup>e</sup>   |
| Pb | <i>F. distichus</i> - PH | <i>F. distichus</i> collected from Point Hope                                    | 13.192 <sup>b</sup> | 5 <sup>e</sup>   |
| Hg | Peanut butter            | Peanut butter, smooth/creamy                                                     | 0.0002 <sup>d</sup> | 32 <sup>e</sup>  |
| Hg | Eggs                     | Eggs, boiled                                                                     | 0.0001 <sup>d</sup> | 50 <sup>e</sup>  |
| Hg | Bread                    | Bread, white, enriched                                                           | 0.0001 <sup>d</sup> | 50 <sup>e</sup>  |
| Hg | Spinach                  | Spinach, fresh/frozen, boiled                                                    | 0.0003 <sup>d</sup> | 85 <sup>e</sup>  |
| Hg | Rice                     | Rice, white, enriched, cooked                                                    | 0.0004 <sup>d</sup> | 140 <sup>e</sup> |
| Hg | Clam chowder             | Clam chowder, New England -- canned, condensed, prepared with whole milk.        | 0.0003 <sup>d</sup> | 245 <sup>e</sup> |
| Hg | Mushrooms                | Mushrooms, raw                                                                   | 0.001 <sup>d</sup>  | 85 <sup>e</sup>  |
| Hg | Catfish                  | Catfish, pan-cooked with oil                                                     | 0.003 <sup>d</sup>  | 85 <sup>e</sup>  |
| Hg | <i>F. distichus</i>      | <i>F. distichus</i> : mean of all sites except Wing Point and Deep Bay           | 0.058 <sup>f</sup>  | 5 <sup>e</sup>   |
| Hg | Fish sticks              | Fish stick or patty, frozen, oven-cooked                                         | 0.004 <sup>d</sup>  | 85 <sup>e</sup>  |
| Hg | Shrimp                   | Shrimp, boiled                                                                   | 0.006 <sup>d</sup>  | 85 <sup>e</sup>  |
| Hg | <i>N. luetkeana</i>      | <i>N. luetkeana</i> : mean of all sites except Victoria Jetty                    | 0.116 <sup>f</sup>  | 5 <sup>e</sup>   |
| Hg | <i>F. distichus</i> -WP  | <i>F. distichus</i> collected from Wing Point                                    | 0.192 <sup>f</sup>  | 5 <sup>e</sup>   |
| Hg | <i>F. distichus</i> -DB  | <i>F. distichus</i> collected from Deep Bay                                      | 0.205 <sup>f</sup>  | 5 <sup>e</sup>   |
| Hg | <i>N. luetkeana</i> -VJ  | <i>N. luetkeana</i> collected from Victoria Jetty                                | 0.250 <sup>f</sup>  | 5 <sup>e</sup>   |
| Hg | Tuna noodle casserole    | Tuna noodle casserole, homemade                                                  | 0.016 <sup>d</sup>  | 140 <sup>e</sup> |
| Hg | Salmon                   | Salmon, steaks/fillets baked                                                     | 0.021 <sup>d</sup>  | 85 <sup>e</sup>  |
| Hg | Tuna                     | Tuna, canned in water, drained                                                   | 0.136 <sup>d</sup>  | 85 <sup>e</sup>  |

<sup>a</sup>[43]; <sup>b</sup>[44]; <sup>c</sup>[45]; <sup>d</sup> 46]; <sup>e</sup> [47]; and <sup>f</sup> this study.
