# Supplementary material for: Chemical contaminant levels in edible seaweeds of the Salish Sea and implications for their consumption
Source: PubMed Central journal article supplement (PMC9506624; doi:10.1371/journal.pone.0269269), 2022-09-23
Supplement: pone.0269269.s009.pdf [file pone.0269269.s009.pdf]

**Table S4.**

| <b>Collection Site</b> | <b>Species</b> | <b>Collection Date</b> | <b>Cd (16)</b> | <b>Hg (1.6)</b> | <b>Pb (5)</b> | <b>BaP (16)</b> | <b>Σ<sub>40</sub>PCBs (8)</b> | <b>ET-PCBs (8)</b>     |
|------------------------|----------------|------------------------|----------------|-----------------|---------------|-----------------|-------------------------------|------------------------|
| AB                     | FD             | 08/17/15               | ≥5             | ≥5              | ≥5            | ≥5              | ≥5                            | <b>4.9*</b>            |
| AS                     | FD             | 09/03/15               | ≥5             | ≥5              | ≥5            | ≥5              | 3.7                           | <b>3.6*</b>            |
| BB                     | FD             | 07/04/15               | ≥5             | ≥5              | ≥5            | ≥5              | ≥5                            | ≥5                     |
| BM                     | FD             | 08/31/15               | ≥5             | ≥5              | ≥5            | ≥5              | 2.7                           | <b>2.6*</b>            |
| BR                     | FD             | 08/07/15               | ≥5             | ≥5              | ≥5            | ≥5              | 4.5                           | <b>4.3*</b>            |
| CA                     | FD             | 09/02/15               | ≥5             | ≥5              | ≥5            | ≥5              | <b>3.7</b>                    | 3.8 <sup>¥</sup>       |
| CB                     | FD             | 06/04/15               | ≥5             | ≥5              | ≥5            | ≥5              | ≥5                            | <b>4.4*</b>            |
| CH                     | FD             | 07/07/15               | ≥5             | ≥5              | ≥5            | ≥5              | 3.9                           | <b>3.8*</b>            |
| CI                     | FD             | 06/05/15               | ≥5             | ≥5              | ≥5            | ≥5              | <b>4.2</b>                    | 4.3 <sup>¥</sup>       |
| CM                     | FD             | 08/05/15               | ≥5             | ≥5              | ≥5            | ≥5              | ≥5                            | ≥5                     |
| DB                     | FD             | 08/13/15               | ≥5             | ≥5              | ≥5            | ≥5              | ≥5                            | ≥5                     |
| DP                     | FS             | 09/02/15               | ≥5             | ≥5              | ≥5            | ≥5              | ≥5                            | ≥5                     |
| EF                     | FD             | 09/01/15               | ≥5             | ≥5              | ≥5            | ≥5              | 4.9                           | <b>4.4*</b>            |
| EH                     | FD             | 08/07/15               | ≥5             | ≥5              | ≥5            | ≥5              | 4.0                           | <b>3.9*</b>            |
| ES                     | FD             | 08/16/15               | ≥5             | ≥5              | ≥5            | ≥5              | ≥5                            | ≥5                     |
| FB                     | FS             | 08/26/15               | ≥5             | ≥5              | ≥5            | ≥5              | 4.4                           | <b>4.3*</b>            |
| FM                     | FD             | 07/01/15               | ≥5             | ≥5              | ≥5            | ≥5              | ≥5                            | 4.6*                   |
| FR                     | FD             | 08/02/15               | ≥5             | ≥5              | ≥5            | ≥5              | 4.8                           | <b>4.3*</b>            |
| FW                     | FD             | 07/03/15               | ≥5             | ≥5              | ≥5            | ≥5              | 3.7                           | <b>3.2*</b>            |
| GM                     | FD             | 08/10/15               | ≥5             | ≥5              | ≥5            | ≥5              | ≥5                            | <b>5.0*</b>            |
| HB                     | FD             | 07/30/15               | ≥5             | ≥5              | ≥5            | ≥5              | 4.8                           | <b>4.4*</b>            |
| JB                     | FD             | 06/30/15               | ≥5             | ≥5              | ≥5            | ≥5              | ≥5                            | ≥5                     |
| KB                     | FD             | 08/12/15               | ≥5             | ≥5              | ≥5            | ≥5              | ≥5                            | ≥5                     |
| LT                     | FD             | 08/25/15               | ≥5             | ≥5              | ≥5            | ≥5              | 3.6                           | <b>3.8<sup>¥</sup></b> |
| MF                     | FD             | 06/16/15               | ≥5             | ≥5              | ≥5            | ≥5              | 5.0                           | <b>4.8*</b>            |
| PA                     | FD             | 07/17/15               | ≥5             | ≥5              | ≥5            | ≥5              | 4.4                           | <b>4.1*</b>            |
| PE                     | FD             | 08/27/15               | ≥5             | ≥5              | ≥5            | ≥5              | ≥5                            | ≥5                     |
| PH                     | FD             | 07/18/15               | ≥5             | ≥5              | <b>1.9</b>    | ≥5              | 3.1                           | 2.7*                   |
| PI                     | FD             | 07/05/15               | ≥5             | ≥5              | ≥5            | ≥5              | ≥5                            | ≥5                     |
| PO                     | FS             | 08/03/15               | ≥5             | ≥5              | <b>1.9</b>    | 3.8             | 2.8                           | <b>2.4*</b>            |
| PP                     | FD             | 07/29/15               | ≥5             | ≥5              | ≥5            | ≥5              | 4.4                           | <b>3.8*</b>            |
| RB                     | FD             | 07/18/15               | ≥5             | ≥5              | 2.6           | <b>1.2</b>      | 1.9                           | 1.6*                   |
| RW                     | FD             | 09/06/15               | ≥5             | ≥5              | ≥5            | ≥5              | 3.3                           | <b>2.6*</b>            |
| SB                     | FD             | 08/09/15               | ≥5             | ≥5              | ≥5            | ≥5              | <b>3.7</b>                    | <b>3.7</b>             |
| SC                     | FD             | 06/02/15               | ≥5             | ≥5              | ≥5            | ≥5              | 2.1                           | <b>2.0*</b>            |
| SI                     | FD             | 07/30/15               | ≥5             | ≥5              | ≥5            | ≥5              | 3.3                           | <b>3.7<sup>¥</sup></b> |
| SN                     | FD             | 08/04/15               | ≥5             | ≥5              | ≥5            | ≥5              | 2.8                           | <b>2.6</b>             |
| TJ                     | FD             | 08/10/15               | ≥5             | ≥5              | ≥5            | ≥5              | 2.4                           | <b>2.2*</b>            |
| VI                     | FD             | 07/02/15               | ≥5             | ≥5              | ≥5            | ≥5              | 3.3                           | <b>2.8*</b>            |

|    |    |          |          |          |          |          |            |                        |
|----|----|----------|----------|----------|----------|----------|------------|------------------------|
| VI | FD | 08/14/15 | $\geq 5$ | $\geq 5$ | $\geq 5$ | $\geq 5$ | <b>2.9</b> | <b>2.9</b>             |
| VI | FD | 06/02/15 | $\geq 5$ | $\geq 5$ | $\geq 5$ | $\geq 5$ | 2.0        | <b>2.1<sup>¥</sup></b> |
| VJ | FD | 07/18/15 | $\geq 5$ | $\geq 5$ | $\geq 5$ | $\geq 5$ | 2.1        | <b>2.2<sup>¥</sup></b> |
| WP | FD | 06/30/15 | $\geq 5$ | $\geq 5$ | $\geq 5$ | $\geq 5$ | 2.6        | <b>2.8<sup>¥</sup></b> |
